# Supplementary material for: An Overview on Microfluidic Systems for Nucleic Acids Extraction from Human Raw Samples
Source: MDPI journal article supplement (doi:10.3390/s21093058), 2021-04-27
Supplement: s1 [file s1]

| OFF-CHIP SAMPLE PREPARATION                                                 |                                                                                                                                                                                                                                                                                                                                                                                                                                                  |                        |           |
|-----------------------------------------------------------------------------|--------------------------------------------------------------------------------------------------------------------------------------------------------------------------------------------------------------------------------------------------------------------------------------------------------------------------------------------------------------------------------------------------------------------------------------------------|------------------------|-----------|
| CHEMICAL LYSIS                                                              |                                                                                                                                                                                                                                                                                                                                                                                                                                                  |                        |           |
| Sample type                                                                 | Off-chip sample pretreatment                                                                                                                                                                                                                                                                                                                                                                                                                     | Lysis type             | Reference |
| Whole blood, 50 $\mu$ L                                                     | Load solution preparation (50 $\mu$ L): Sample (50 $\mu$ L), 30% Triton X-100 (17 $\mu$ L), Proteinase K (30 $\mu$ L; at 20 mg/mL) and loading buffer (403 $\mu$ L) containing 6M GuHCl, 10 mM Tris, 1 mM EDTA, pH 6.0. Mixing for 30 sec.                                                                                                                                                                                                       | Chemical               | 33        |
| Whole blood, 4 $\mu$ L<br>Nasal Aspirate, 8 $\mu$ L                         | Load solution preparation (100 $\mu$ L): Sample (4 or 8 $\mu$ L), Proteinase K (5 $\mu$ L), 6M GuHCl (91 or 87 $\mu$ L). Vortexing for 30 sec.                                                                                                                                                                                                                                                                                                   | Chemical               | 44        |
| Semen, 1.5 $\mu$ L                                                          | Load solution preparation (200 $\mu$ L): Sample (1.5 $\mu$ L), 6M GuHCl with 40mM DDT (198.5 $\mu$ L). Vortexing.                                                                                                                                                                                                                                                                                                                                | Chemical               | 76        |
| Whole blood, 4 $\mu$ L<br>Semen, 5 $\mu$ L<br>Buccal/nasal swab, 10 $\mu$ L | Load solution preparation: Crude sample or cells in water solution (4/10/5/10 $\mu$ L), Proteinase K (10/20/0/10 $\mu$ L), GuHCl (486/500/495/180 $\mu$ L) added of 40mM DDT in case of semen. Vortexing for 15 sec.                                                                                                                                                                                                                             | Chemical               | 25        |
| Whole blood, 10 $\mu$ L<br>Spinal fluid, 40 $\mu$ L                         | Load solution preparation (1000 $\mu$ L): Sample (10 or 40 $\mu$ L), 10% or 1% Triton X-100 (54 $\mu$ L or 60 $\mu$ L). Vortexing for 5 min. Reaching the final volume by addition of 6M GuHCl. Filtration with 0.22 $\mu$ m sterile filter before loading.                                                                                                                                                                                      | Chemical               | 43        |
| Whole blood, 50 $\mu$ L                                                     | Load solution preparation: Sample (50 $\mu$ L) pipetted for 5 min with GuSCN-based lysis buffer (RLT Buffer, Qiagen) at room temperature                                                                                                                                                                                                                                                                                                         | Chemical               | 48        |
| Whole blood, 20 $\mu$ L                                                     | Load solution preparation (400 $\mu$ L): Sample (20 $\mu$ L); Proteinase K (20 $\mu$ L), 1% Triton X-100 (160 $\mu$ L), NaCl and water (200 $\mu$ L).                                                                                                                                                                                                                                                                                            | Chemical               | 37        |
| Whole blood, 0.1 - 100 $\mu$ L<br>Throat swabs, 300 $\mu$ L                 | Load solution preparation: Blood (0.1 to 100 $\mu$ L) mixed with GuSCN-based lysis buffer (350 - 700 $\mu$ L; Buffer RLT, Qiagen). Throat swabs solution (300 $\mu$ L) mixed with lysis/binding buffer (350 $\mu$ L; 100mM Tris-HCl, 500mM LiCl, 10mM EDTA, 1% LiDS, 5mM DDT). Load solution is prepared by addition of oligo-dT magnetic beads, mixed and incubated at room temperature for 5 min, before charging on syringe pumps.            | Chemical               | 30        |
| Whole blood                                                                 | Load solution preparation: Whole blood, with cancer cells, mixed with GuSCN-based lysis buffer (Buffer RLT, Qiagen) and pressure-vacuum delivered across the membrane.                                                                                                                                                                                                                                                                           | Chemical               | 47        |
| Nasal wash, 30 $\mu$ L                                                      | Load solution preparation: Sample (30 $\mu$ L) homogenized by hand passage into a 25-gauge needle for 5 times. Infected sample is mixed with lysis/binding buffer (300 $\mu$ L; 2M GuSCN, 25mM sodium citrate, pH 7, 50% ethanol) and silica coated magnetic beads (20 $\mu$ L). Mixed for 5 min at room temperature.                                                                                                                            | Chemical               | 70        |
| Nasal wash/swab, 100 $\mu$ L                                                | Load solution preparation: Sample (100 $\mu$ L) mixed with lysis buffer (300 $\mu$ L; 2M GuSCN). Lysed solution is added with a syringe pump.                                                                                                                                                                                                                                                                                                    | Chemical               | 69        |
| Semen, 25 $\mu$ L                                                           | Load solution preparation: Sample (4 $\mu$ L) is mixed with lysis buffer (96 $\mu$ L; 6M GuHCl with 40mM DDT) and loaded onto the chip with a syringe pump.                                                                                                                                                                                                                                                                                      | Chemical               | 10        |
| Whole Blood, 5 $\mu$ L                                                      | Load solution preparation: Sample (5 $\mu$ L) mixed with lysis buffer (45 $\mu$ L; 50mM MES, 1% Triton X-100 and 2 mg/ $\mu$ L of Proteinase K) and incubated for 30 min at room temperature. Lysed solution (50 $\mu$ L) loaded with a manual syringe.                                                                                                                                                                                          | Chemical               | 45        |
| Whole Blood, 90 $\mu$ L                                                     | Load solution preparation: sample (90 $\mu$ L) is mixed with lysis buffer (GuSCN-based), detergents (N-lauroylsarcosine, 2-mercaptoethanol, NP-40) and incubated for 15 min at room temperature.                                                                                                                                                                                                                                                 | Chemical               | 40        |
| MECHANICAL + CHEMICAL LYSIS                                                 |                                                                                                                                                                                                                                                                                                                                                                                                                                                  |                        |           |
| Whole blood, 10 $\mu$ L                                                     | DNA pre-concentration on lysate: lysis buffer (125 $\mu$ L; 6M GuHCl) loaded onto the octadecyl (C18) reversed-phase pre-column. Sample (10 $\mu$ L) is then loaded. DNA is pre-concentrated and eluted from this phase, which then binds proteins with stronger affinity than DNA, as a sieve.                                                                                                                                                  | Mechanical<br>Chemical | 38        |
| Stool, 180-220 mg                                                           | Sample (180 - 220 mg) mixed and incubated with 5.5M GuSCN (700 $\mu$ L) for 30 min. Lysed sample filtered on a 0.2 $\mu$ m pore-size filter prior the extraction to ensure the correct fluid circulation and prevent a blockage by solid pieces. Liquid stool samples are well processed by this device without the use of electrical energy but, in case of solid stool samples, it would be necessary to centrifuge the sample before the use. | Mechanical<br>Chemical | 74        |

**Table S1:** Pretreatment procedures applied to different sample types when an off-chip lysis was performed prior the loading on LOC. Similarly to the described on-chip lysis procedures (Table2), guanidinium salts (GuHCl and GuSCN), often coupled with detergents, are the most used chaotropic agents with the capacity of solubilizing proteins.

- 10 Hagan, K.A.; Bienvenue, J.M.; Moskaluk, C.A.; Landers, J.P. Microchip-based solid-phase purification of RNA from biological samples. *Anal. Chem.* **2008**, *80*, 8453–8460, doi:10.1021/ac8011945.
- 25 Legendre, L.A.; Bienvenue, J.M.; Roper, M.G.; Ferrance, J.P.; Landers, J.P. A simple, valveless microfluidic sample preparation device for extraction and amplification of DNA from nanoliter-volume samples. *Anal. Chem.* **2006**, *78*, 1444–1451, doi:10.1021/ac0516988.
- 30 Han, N.; Shin, J.H.; Han, K.H. An on-chip RT-PCR microfluidic device, that integrates mRNA extraction, cDNA synthesis, and gene amplification. *RSC Adv.* **2014**, *4*, 9160–9165, doi:10.1039/c3ra47980c.
- 33 Wu, Q.; Jin, W.; Zhou, C.; Han, S.; Yang, W.; Zhu, Q.; Jin, Q.; Mu, Y. Integrated glass microdevice for nucleic acid purification, loop-mediated isothermal amplification, and online detection. *Anal. Chem.* **2011**, *83*, 3336–3342, doi:10.1021/ac103129e.
- 37 Kim, J.; Gale, B.K. Quantitative and qualitative analysis of a microfluidic DNA extraction system using a nanoporous AlO<sub>x</sub> membrane. *Lab Chip* **2008**, *8*, 1516–1523, doi:10.1039/b804624g.
- 38 Wen, J.; Guillo, C.; Ferrance, J.P.; Landers, J.P. Microfluidic-based DNA purification in a two-stage, dual-phase microchip containing a reversed-phase and a photopolymerized monolith. *Anal. Chem.* **2007**, *79*, 6135–6142, doi:10.1021/ac0703698.
- 40 Kolluri, N.; Albarran, N.; Fan, A.; Olson, A.; Sagar, M.; Young, A.; Gomez-Marquez, J.; Klapperich, C.M. SNAPflex: A paper-and-plastic device for instrument-free RNA and DNA extraction from whole blood. *Lab Chip* **2020**, *20*, 3386–3398, doi:10.1039/d0lc00277a.
- 43 Wu, Q.; Bienvenue, J.M.; Hassan, B.J.; Kwok, Y.C.; Giordano, B.C.; Norris, P.M.; Landers, J.P.; Ferrance, J.P. Microchip-based macroporous silica sol-gel monolith for efficient isolation of DNA from clinical samples. *Anal. Chem.* **2006**, *78*, 5704–5710, doi:10.1021/ac060390t.
- 44 Easley, C.J.; Karlinsey, J.M.; Bienvenue, J.M.; Legendre, L.A.; Roper, M.G.; Feldman, S.H.; Hughes, M.A.; Hewlett, E.L.; Merkel, T.J.; Ferrance, J.P.; et al. A fully integrated microfluidic genetic analysis system with sample-in-answer-out capability. *Proc. Natl. Acad. Sci. U. S. A.* **2006**, *103*, 19272–19277, doi:10.1073/pnas.0604663103.
- 45 Cao, W.; Easley, C.J.; Ferrance, J.P.; Landers, J.P. Chitosan as a polymer for pH-induced DNA capture in a totally aqueous system. *Anal. Chem.* **2006**, *78*, 7222–7228, doi:10.1021/ac060391l.
- 47 Kokoris, M.; Nabavi, M.; Lancaster, C.; Clemmens, J.; Maloney, P.; Capadanno, J.; Gerdes, J.; Battrell, C.F. Rare cancer cell analyzer for whole blood applications: Automated nucleic acid purification in a microfluidic disposable card. *Methods* **2005**, *37*, 114–119, doi:10.1016/j.ymeth.2005.07.002.
- 48 Lee, H.; Jung, J.; Han, S.I.; Han, K.H. High-speed RNA microextraction technology using magnetic oligo-dT beads and lateral magnetophoresis. *Lab Chip* **2010**, *10*, 2764–2770, doi:10.1039/c005145d.
- 69 Cao, Q.; Mahalanabis, M.; Chang, J.; Carey, B.; Hsieh, C.; Stanley, A.; Odell, C.A.; Mitchell, P.; Feldman, J.; Pollock, N.R.; et al. Microfluidic chip for molecular amplification of influenza A RNA in human respiratory specimens. *PLoS One* **2012**, *7*, 1–11, doi:10.1371/journal.pone.0033176.
- 70 Bordelon, H.; Adams, N.M.; Klemm, A.S.; Russ, P.K.; Williams, J. V.; Talbot, H.K.; Wright, D.W.; Haselton, F.R. Development of a low-resource RNA extraction cassette based on surface tension valves. *ACS Appl. Mater. Interfaces* **2011**, *3*, 2161–2168, doi:10.1021/am2004009.
- 74 Huang, S.; Do, J.; Mahalanabis, M.; Fan, A.; Zhao, L.; Jepeal, L.; Singh, S.K.; Klapperich, C.M. Low Cost Extraction and Isothermal Amplification of DNA for Infectious Diarrhea Diagnosis. *PLoS One* **2013**, *8*, doi:10.1371/journal.pone.0060059.
- 76 Bienvenue, J.M.; Legendre, L.A.; Ferrance, J.P.; Landers, J.P. An integrated microfluidic device for DNA purification and PCR amplification of STR fragments. *Forensic Sci. Int. Genet.* **2010**, *4*, 178–186, doi:10.1016/j.fsigen.2009.02.010.
